# 1 Network based conditional genome wide association analysis of human 2 metabolomics

3  
4  
5  
6 Tsepilov Y.A.<sup>1</sup>, Sharapov S.Zh.<sup>1,2</sup>, Zaytseva O.O.<sup>1,2</sup>, Krumsek J.<sup>3</sup>, Prehn C.<sup>4</sup>, Adamski J.<sup>4,5,6</sup>,  
7 Kastenmüller G.<sup>7</sup>, Wang-Sattler R.<sup>6,8,9</sup>, Strauch K.<sup>10,11</sup>, Gieger C.<sup>6,8,9</sup>, Aulchenko Y.S.<sup>1,2,\*</sup>

8  
9 1 Institute of Cytology and Genetics SB RAS, 630090 Novosibirsk, Russia

10 2 Novosibirsk State University, 630090 Novosibirsk, Russia

11 3 Institute of Computational Biology, Helmholtz Zentrum München -German Research  
12 Center for Environmental Health, 85764 Neuherberg, Germany.

13 4 Institute of Experimental Genetics, Genome Analysis Center, Helmholtz Zentrum  
14 München-German Research Center for Environmental Health, 85764 Neuherberg, Germany.

15 5 Institute of Experimental Genetics, Life and Food Science Center Weihenstephan,  
16 Technische Universität München, 85354 Freising-Weihenstephan, Germany

17 6 German Center for Diabetes Research, 85764 Neuherberg, Germany.

18 7 Institute of Bioinformatics and Systems Biology, Helmholtz Zentrum München-German  
19 Research Center for Environmental Health, 85764 Neuherberg, Germany.

20 8 Research Unit of Molecular Epidemiology, Helmholtz Zentrum München-German Research  
21 Center for Environmental Health, 85764 Neuherberg, Germany

22 9 Institute of Epidemiology II, Helmholtz Zentrum München-German Research Center for  
23 Environmental Health, 85764 Neuherberg, Germany

24 10 Institute of Genetic Epidemiology, Helmholtz Zentrum München - German Research  
25 Center for Environmental Health, 85764 Neuherberg, Germany

26 11 Institute of Medical Informatics, Biometry and Epidemiology, Chair of Genetic  
27 Epidemiology, Ludwig-Maximilians-Universität, 80539, Munich, Germany

28

29

30 \* Correspondence to

31 Aulchenko S. Yurii

32 Institute of Cytology and Genetics SB RAS, 630090 Novosibirsk, Russia

33 [yurii@bionet.nsc.ru](mailto:yurii@bionet.nsc.ru)

34

35 *Keywords: genome-wide association studies; multivariate model; metabolomics; conditional*  
36 *analysis, pleiotropy*

37

## 38 **Abstract**

39 **Background:** Genome-wide association studies (GWAS) have identified hundreds of loci  
40 influencing complex human traits, however, their biological mechanism of action remains mostly  
41 unknown. Recent accumulation of functional genomics ('omics') including metabolomics data  
42 opens up opportunities to provide a new insight into the functional role of specific changes in the  
43 genome. Functional genomic data are characterized by high dimensionality, presence of (strong)  
44 statistical dependencies between traits, and, potentially, complex genetic control. Therefore,  
45 analysis of such data asks for development of specific statistical genetic methods.

46 **Results:** We propose a network-based, conditional approach to evaluate the impact of genetic  
47 variants on omics phenotypes (conditional GWAS, cGWAS). For each trait of interest, based on  
48 biological network, we select a set of other traits to be used as covariates in GWAS. The network  
49 could be reconstructed either from biological pathway databases or directly from the data. We  
50 evaluated our approach using data from a population-based KORA study (n=1,784, 1.7 M SNPs)  
51 with measured metabolomics data (151 metabolites) and demonstrated that our approach allows  
52 for identification of up to five additional loci not detected by conventional GWAS. We show that  
53 this gain in power is achieved through increased precision of genetic effect estimates, and in  
54 presence of specific 'contra-intuitive' pleiotropic scenarios (when genetic and environmental  
55 sources of covariance are acting in opposite manner). We justify existence of such scenarios, and  
56 discuss possible applications of our method beyond metabolomics.

57 **Conclusions:** We demonstrate that in context of metabolomics network-based, conditional  
58 genome-wide association analysis is able to dramatically increase power of identification of loci  
59 with specific 'contra-intuitive' pleiotropic architecture. Our method has modest computational  
60 costs, can utilize summary level GWAS data, and is applicable to other omics data types. We  
61 anticipate that application of our method to new and existing data sets will facilitate progress in  
62 understanding genetic bases of control of molecular and complex phenotypes.

63

64 **Short abstract**

65 We propose a network-based, conditional approach for genome-wide analysis of multivariate  
66 omics phenotypes. Our methods can incorporate prior biological knowledge about biological  
67 pathways from external sources. We evaluated our approach using metabolomics data and  
68 demonstrated that our approach has bigger power and allows for identification of additional loci.  
69 We show that gain in power is achieved through increased precision of genetic effect estimates,  
70 and in presence of specific ‘contra-intuitive’ pleiotropic scenarios (when genetic and  
71 environmental sources of covariance are acting in opposite manner). We justify existence of such  
72 scenarios, and discuss possible applications of our method beyond metabolomics.

## 73 **Background**

74 Genome-wide association studies (GWAS) is one of the most popular methods of identification of  
75 alleles that affect complex traits, including risk of common human diseases. In the past decade,  
76 GWAS allowed identification of thousands of loci, leading to a significant progress in  
77 understanding of genetic bases of control of complex human traits [1]. However, this had limited  
78 impact onto development of biomarkers and therapeutic agents, as most of the time the observation  
79 of association to a genomic region provides a starting point, but not yet a direct answer to the  
80 question of biological function affected by variation in the identified region. Recent accumulation  
81 of functional genomics data, which includes information on levels of gene expression  
82 (transcriptome), metabolites (metabolome), proteins (proteome) and glycosylation (glycome),  
83 could give a new insight into the functional role of specific changes in the genome [2,3]. Such data  
84 require special statistical methods for their analysis, because of their characteristically high  
85 dimensionality (ranging from few dozens to thousands and even to millions of measurements for  
86 each person), and presence of statistical dependencies reflecting biological relationships between  
87 individual omics components. Development of methods for omics data analysis is of current  
88 importance as the progress of molecular biology techniques continues and new types of functional  
89 genomic data become available.

90 Conventional univariate GWAS (uGWAS) ignore dependencies between different omics traits,  
91 which confounds biological interpretation of results and may lead to loss of statistical power. It  
92 was shown that utilizing multivariate phenotype representation increases statistical power, and  
93 leads to richer findings in the association tests compared to the univariate analysis [4–7]. Despite  
94 large number of methodological works, only few empirical multivariate GWAS have been  
95 published for humans. Among these which should be noted in relation to our work, Inouye et al.  
96 [8] performed multivariate GWAS of 130 NMR metabolites (grouped in 11 sets) in ~6600  
97 individuals. The study demonstrated that multivariate analysis doubles the number of loci detected  
98 in this sample; among loci discovered via multivariate analysis seven were novel and did not  
99 appear before in other GWAS of related traits. While no replication of novel loci was performed  
100 in the original study, we compared results reported by Inouye et al. with recently published  
101 univariate GWAS of NMR metabolomics, which used sample size of up to 24,925 individuals [9].  
102 We found that for three out of seven SNPs reported in the original work, p-value was  $< 5 \times 10^{-11}$  for  
103 at least one metabolite. This provides empirical evidence for the value of multivariate methods in  
104 genomics of metabolic traits.

105 Here we propose a (knowledge-based) network-driven conditional genome-wide  
106 association analysis that exploits information from biologically related traits. To demonstrate our

107 methodology, we performed proof-of-principle study directly comparing the power of univariate  
108 GWAS and the proposed method using metabolomics data (151 metabolites, Biocrates assay) from  
109 the KORA F4 study (n=1785).  
110  
111

## 112 Results and Discussion

### 113 Network-based conditional analysis of genetic associations

114 We start with theoretical justification and identification of specific scenarios under which  
115 adjustment for a biologically relevant covariate increases power of association analysis. Let us  
116 consider a trait of interest,  $y$ , covariate  $c$  and genotype  $g$ . Without loss of generality, assume that  
117 they are distributed with mean zero and standard deviation of one. Their joint distribution is  
118 specified by a set of three correlation coefficients,  $\rho$ . Given specific parameter values, the value  
119 of “univariate” test statistic for association between  $y$  and  $g$  has the value  $T_c^2 = n \rho_{yg}^2 / \sigma_u^2$ , where  
120  $n$  is the sample size and  $\sigma_u^2 = 1 - \rho_{yg}^2$  is the residual variance of  $y$ . For the conditional test,  $T_c^2 =$   
121  $n \beta_{yg}^2 / \sigma_c^2 = n(\rho_{yg} - \beta_{yc}\rho_{cg}) / \sigma_c^2$ , where  $\beta$  denote partial coefficients of regression from the  
122 conditional model and  $\sigma_c^2$  is the residual variance of  $y$ . Consequently, the log-ratio of these test  
123 statistics can be partitioned into two components

$$124 \quad \log\left(\frac{T_c^2}{T_u^2}\right) = \log\left(\frac{\sigma_u^2}{\sigma_c^2}\right) + \log\left(\left[1 - \frac{\beta_{yc}\rho_{cg}}{\rho_{yg}}\right]^2\right) \quad (1)$$

125 We shall call the first summand of (1) as ‘noise’ component and the second summand as  
126 the ‘pleiotropic’ component. Because the noise component  $(\sigma_u^2/\sigma_c^2) \geq 1$  always, any possible  
127 reduction in the ratio between univariate and conditional test is determined by the sign and the  
128 magnitude of the term  $\beta_{yc}\rho_{cg}/\rho_{yg}$ . When this product is negative, there is always increase in  
129 power of conditional analysis.

130 We can re-write  $\beta_{yc}\rho_{cg}/\rho_{yg}$  as  $\beta_{yc}\rho_{yc}^*$ , where  $\rho_{yc}^* = \rho_{gc}/\rho_{yg}$  is a quantity which in a  
131 Mendelian randomization analysis is interpreted as the effect of the covariate on the trait free of  
132 non-genetic confounders [10]. Note that while  $\rho_{yc}^*$  is reflecting the covariance between the trait  
133 and the covariate, which is induced by the effect of the genotype,  $\beta_{yc}$  is related to ‘purely  
134 environmental’ sources of covariance between  $y$  and  $c$ . We can conclude that when genotype-  
135 induced and environmental correlations are consistent in sign, the product  $\beta_{yc}\rho_{yc}^*$  is positive and  
136 hence the contribution of the second term of (1) into relative power is negative. On the contrary, a  
137 ‘surprising’ product (where the sign is inconsistent and hence  $\beta_{yc}\rho_{yc}^*$  is negative) contribute  
138 positively to the relative power of conditional model.

139 In the context of complex polygenic traits, one expects that genetic and environmental  
140 correlations are consistent in sign. This is well reflected in animal breeding literature, and for a  
141 recent human example, one can see [11]. Under this scenario it would be desirable that  $\rho_{cg}$  (effect  
142 of genotype onto covariate) is very small, while  $\beta_{yc}$  (which makes contribution into reduction of

143  $\sigma_c^2$  compared to  $\sigma_u^2$ ) is large. However, in the context of specific locus affecting an activity of an  
144 enzyme involved in a biochemical reaction, the ‘surprising’ inconsistency between  $\beta_{yc}$  and  $\rho_{yc}^*$   
145 may be not so surprising. Indeed, consider an allele, which is associated with increased activity of  
146 an enzyme converting substrate A into product B. It is expected that A and B are positively  
147 correlated, and that the allele is in positive correlation with level of product B and in negative  
148 correlation with the substrate A. This is exactly a scenario which would lead to the positive value  
149 of the second term in (1), hence providing additional increase in power on the top of noise  
150 reduction.

151 We can readily extend the formula (1) to a case when  $k$  covariates are included in the  
152 conditional model. Denoting coefficients of correlation between  $g$  and covariate  $i$  as  $\rho_{gi}$  and partial  
153 coefficients of regression of  $y$  onto covariate  $i$  as  $\beta_i$ , we have

$$154 \quad \log\left(\frac{T_c^2}{T_u^2}\right) = \log\left(\frac{\sigma_u^2}{\sigma_c^2}\right) + \log\left(\left[1 - \frac{1}{\rho_{yg}} \sum_{i=1}^k \beta_i \rho_{gi}\right]^2\right) \quad (2)$$

155 Above considerations allow us to hypothesize that a conditional GWAS (cGWAS), where  
156 covariates selected are biochemical, one-reaction-step neighbors of the target trait may provide  
157 increased power by exploiting both noise reduction and possible ‘surprising’ pleiotropy. In this  
158 work, we set off to empirically verify this hypothesis by investigating of human metabolomics  
159 data.

160 When proper covariates are selected, the methodology of cGWAS using individual-level  
161 data becomes rather trivial, and boils down to running a GWAS in which one jointly estimates the  
162 effect of an SNP and of specific covariates. The cGWAS method is less trivial in case one would  
163 like to exploit summary-level univariate GWAS data, for example these data which are available  
164 from previously published studies. Formulation of cGWAS on the level of summary GWAS  
165 statistics is possible, and we describe this method in Supplementary Note 1.

166 The question of selection of proper covariates is very important because it has direct consequences  
167 on the chances of finding the ‘surprising’ pleiotropic scenarios. In case biological/biochemical  
168 relations between the traits of interest are known and summarized in some database(s), this  
169 knowledge can be used directly by e.g. taking all direct neighbors as covariates. Alternatively, the  
170 network may be reconstructed in a hypothesis-free, empirical manner from the same or external  
171 data by e.g. using Gaussian graphical models (GGM) approach [12]; then some threshold may be  
172 applied to select the covariates.

173

174 **Comparison between cGWAS and uGWAS using human metabolomics data**

175 We compared cGWAS and uGWAS methods using individual-level genetic and metabolomics  
176 data from KORA F4 study (1,784 individuals measured for 151 metabolite, Biocrates assay, and  
177 imputed at 1,717,498 SNPs).

178 First, we explored the potential of cGWAS where covariates were selected based on known  
179 biochemical network. Thus our analysis was restricted to a subset of 105 metabolites for which the  
180 one-reaction-step immediate biochemical neighbors were available [12]. This biochemical  
181 network incorporates only lipid metabolites, and pathway reactions cover two groups of pathways:  
182 (1) Fatty acid biosynthesis reactions which apply to the metabolite classes lyso-PC, diacyl-PC,  
183 acyl-alkyl-PC and sphingomyelins; (2)  $\beta$ -oxidation reactions representing fatty acid degradation  
184 to model reactions between the acyl-carnitines. The  $\beta$ -oxidation model consists of a linear chain  
185 of C2 degradation steps (C10-C8-C6 etc.). Number of covariates varied from one to four with  
186 mean of 2.48 and median 2.

187 **Table 1** shows 11 loci which were significant in either cGWAS or uGWAS analysis and  
188 fall into known regions (see Supplementary Note 2). Of these, ten loci were identifiable by  
189 cGWAS and nine were identifiable by uGWAS. Compared to uGWAS, one locus (*ETFDH*) was  
190 lost, but two additional loci were identified (*ACSL1* for PC ae C42:5, and *PKD2L1* for  
191 lysoPC a C16:1). It is interesting to note that for *ACSL1* (SNP rs4862429 effect onto PC ae C42:5,  
192 with cGWAS  $p=7e-11$ ), the uGWAS  $p$ -value was 0.7. This is expected under the model of  
193 ‘surprising’ pleiotropy.

194 To test whether use of cGWAS increases average power of association analysis, we  
195 contrasted the average of cGWAS and uGWAS maximal chi-squared test statistics for loci from  
196 Table 1. The ratio of average maximal test statistic between cGWAS and uGWAS was 1.59.  
197 However, the Wilcoxon paired sample test contrasting the best cGWAS vs. the best uGWAS  
198 values of chi-squared test statistic, was only marginally significant ( $p=0.067$ ).

199 For the SNPs listed in **Table 1**, we applied formula (2) to partition the log-ratio of the  
200 cGWAS and uGWAS test statistics into ‘noise’ and ‘pleiotropic’ components. **Figure 1** shows that  
201 the trend in the ratio is mainly determined by the second (‘pleiotropic’) summand. One can see  
202 that, with the exception of locus *SLC22A4*, SNP-trait pairs for which cGWAS had increased power  
203 are these where the second term of (1) is positive or close to zero. In contrast, the SNP-trait  
204 combinations which were lost in cGWAS, had strong negative contribution from the ‘pleiotropic’  
205 term of (2).

206 It is interesting to investigate the variance-covariance structure of loci with positive and  
207 negative pleiotropic term. We selected two loci where the pleiotropic component’s contribution to  
208 power was positive (rs174547 at *FADS1* locus) and negative (rs8396 at *ETFDH*). We show  
209 corresponding correlations between SNP and trait and covariates involved, together with partial



210 coefficients from conditional regression of the trait onto SNP and covariates in Figure 2. For  
211 *FADS1* locus (Figure 2A), the correlation between SNP and the trait (lysoPC a C20:4) and the  
212 covariate (lysoPC a C20:3) are in opposite directions, while the trait and the covariate are  
213 positively correlated (both based on correlation and partial correlation). As a consequence, we can  
214 see that the value of partial regression coefficient between the SNP and lysoPC a C20:4,  
215 conditional on lysoPC a C20:3 is greater than coefficient of regression without covariates. This  
216 makes biological sense as *FADS1* is coding the fatty acid desaturase enzyme, while these two traits  
217 differ from each other by one double bond. It appears that this case suits perfectly the biochemical  
218 scenario under which we expect increased power of conditional analysis.

219 In the second example (Figure 2B, *ETFDH*), we observe that conditional regression of C10  
220 onto rs8396 and two covariates (C8 and C12, medium-chain acylcarnitines) leads to smaller SNP  
221 coefficient compared to unconditional regression; this happens because all terms of  
222  $\sum_{i=1}^k \beta_i \rho_{gi} / \rho_{yg}$  are positive. The *ETFDH* gene, prioritised as the best candidate by DEPICT  
223 (FDR<5%), encodes for electron transfer flavoprotein dehydrogenase that is involved into fatty  
224 acid oxidation in the mitochondria. During this process the acyl group is transferred from long  
225 chain acylcarnitines to form long-chain acetyl-CoA, which is then catabolized. ETF  
226 dehydrogenase takes part in the catabolic process by transferring electrons from Acyl-CoA  
227 dehydrogenase into the oxidative phosphorylation pathway. Thus, the *ETFDH* gene should act on  
228 all kinds of long-chain acylcarnitines in the same direction and we can expect that pleiotropic  
229 influence of this gene onto the acylcarnitines in our example (C8, C10, C12) will be unidirectional.  
230 Presence unidirectional genetic effects and positive correlations between these acylcarnitines  
231 makes second term of equation (2) negative, which leads to the decreased power of genetic  
232 association analysis.

233 Above analysis provide a real-life example that use of biochemical neighbors to adjust  
234 genetic association analysis of target trait allows for (sometimes very sharp) increase of power for  
235 the genetic variants which act in ‘surprising’ pleiotropic manner; our analysis also suggests that  
236 cGWAS may increase GWAS power on average, although this increase is not uniform and heavily  
237 depends on pleiotropic relations between involved locus and the traits.

238 While use of known biochemical network for covariate selection has many attractive  
239 properties, it may be somewhat unpractical, because our biochemical knowledge is yet fragmented.  
240 Therefore, next we have investigated the potential of cGWAS method where covariates are  
241 selected using data-driven approach. The metabolites network was reconstructed using Gaussian  
242 Graphical Models based on partial correlations. For a target metabolite, covariates were selected  
243 based on significant partial correlations. For that, we have chosen threshold proposed previously  
244 in [12]:  $p\text{-value} \leq (0.01/\text{Number of calculated partial correlations})$ , which corresponds to a cut-off

245 p-value  $\leq 8.83 \times 10^{-7}$ . The network used in our analysis is presented in **Supplementary Figure 1**.  
246 For the clarity of notation, hereafter we will call cGWAS using known biochemical network as  
247 BN-cGWAS, and cGWAS which is based on GGM selection of covariates as GGM-cGWAS.  
248

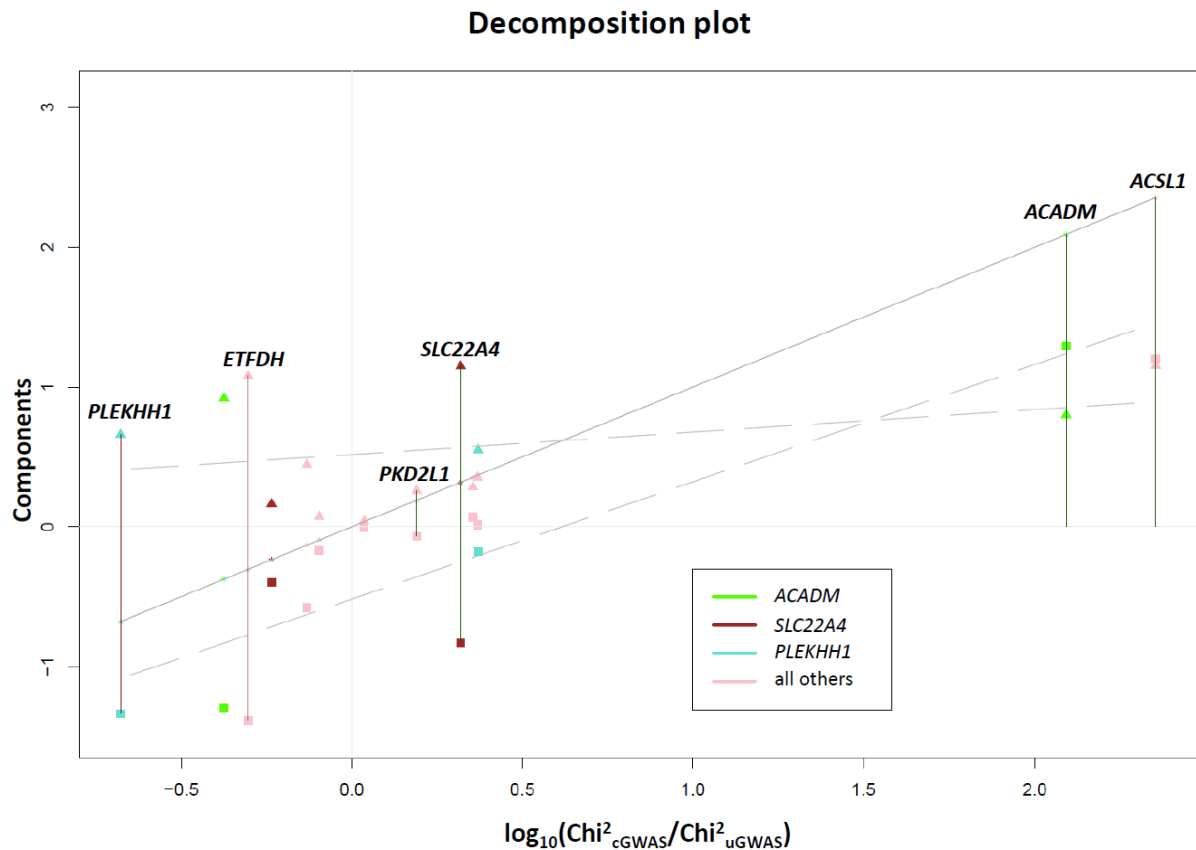

249  
250 **Figure 1. Decomposition of Chi-squared ratio for cGWAS and uGWAS method into**  
251 **pleiotropic and noise components.** The stars correspond to the sum of components that is Chi-  
252 squared ratio ( $y=x$  line). Pleiotropic component is represented by squares, noise component – by  
253 triangles. Dashed lines correspond to regression lines for the two component. Dark green vertical  
254 lines indicate SNP-trait combinations that were significant in cGWAS and not significant in  
255 uGWAS; dark red line indicates the SNP-trait combinations which was significant in uGWAS  
256 only.  
257

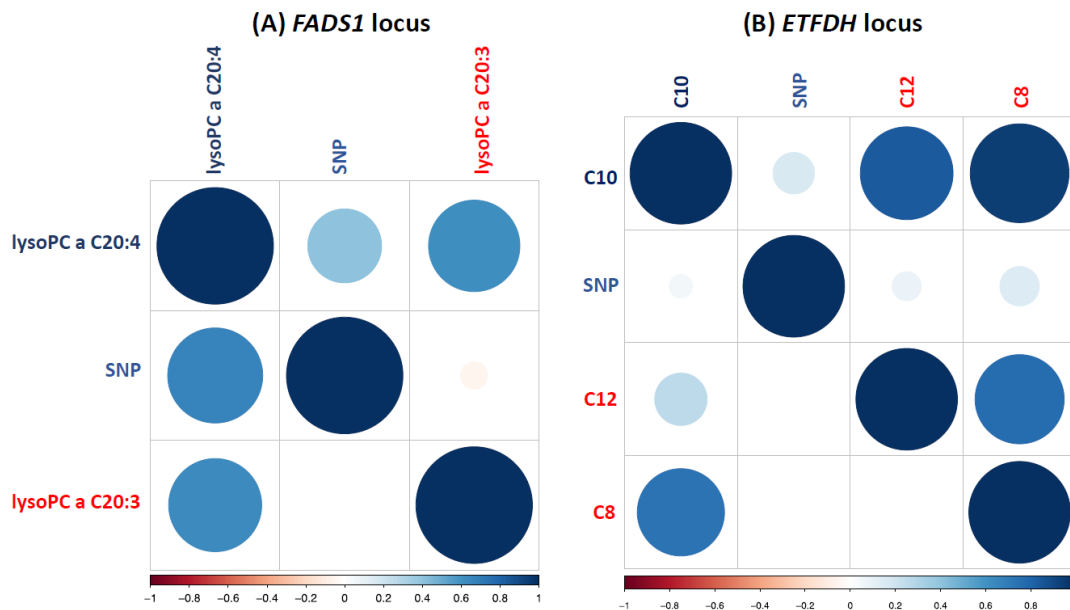

258

259 **Figure 2.** Correlations (above diagonal) and partial coefficients of regression of the trait of interest  
260 (below diagonal) for *FADS1* and *ETFDH* loci, representing scenarios in which pleiotropic term of  
261 (2) is strongly positive and negative respectively.

262

263 To contrast GGM-cGWAS and BN-cGWAS, we first used the same set of metabolites which was  
264 utilized by BN-cGWAS to run GGM-cGWAS. The results are presented in **Supplementary Table**  
265 **1**. We found 16 SNP-trait pairs clustered to 10 loci that could be detected by GGM-cGWAS or  
266 BN-cGWAS. The number of covariates included into GGM-cGWAS analysis, was larger (from 2  
267 to 18, with mean of 8.5) than that in BN-cGWAS. Therefore, we expected that GGM-cGWAS  
268 may gain relative power compared to BN-cGWAS because of noise reduction (term 1 of equation  
269 (2)); however, we it may also be expected that GGM-cGWAS may lose power because of less  
270 likely occurrence of ‘surprise’ pleiotropy (term 2 of equation (2)).

271

272 For the best SNP-trait pairs detected by GGM-cGWAS or BN-cGWAS, we computed the  
273 components of equation (2) and contrasted them using Wilcoxon paired samples test. The noise  
274 component of (2) was always greater for GGM-cGWAS (mean difference of 0.66,  $p=3 \times 10^{-5}$ ). For  
275 GGM-cGWAS, the second ‘pleiotropic’ component of equation (2) was on average smaller than  
276 that for the BN-cGWAS (mean difference -0.54,  $p=0.013$ ); still, for three GGM-cGWAS SNP-  
277 trait pairs out of 16 the pleiotropic component was positive. Average Chi-squared statistics was  
278 33% smaller for GGM-cGWAS than for BN-cGWAS indicating average loss of power (although  
279 this loss was not significant, Wilcoxon paired test  $p=0.5$ ), but at the same time it still was 22%  
280 bigger than uGWAS (Wilcoxon paired test  $p=0.8$ ). We conclude that while GGM-cGWAS is in a  
way imperfect proxy to use of real biochemical network, it may still have increased power because

281 of even further reduced target trait residual variance, and some potential to detect ‘surprising’  
282 pleiotropy.

283 To explore the potential of cGWAS under realistic conditions to a full extent, we analyzed  
284 all 151 available metabolites using GGM-cGWAS and contrasted the results to uGWAS (**Table 2**  
285 and **Supplementary Figure 2**). In total, uGWAS was able to detect 15 loci at genome-wide  
286 significance level defined as  $p \leq 5 \times 10^{-8} / 151 = 3.3 \times 10^{-10}$ . Applying GGM-cGWAS, we identified 19  
287 significant loci at the same threshold. Expectedly, we observed that compared to uGWAS the  
288 precision of genetic effect estimation increased (Table 2, Supplementary Figure 3). The overlap  
289 between uGWAS and GGM-cGWAS findings was 14 loci, with GGM-cGWAS losing one locus  
290 (for C5:1-DC at rs2943644), but identifying five new loci not identified by uGWAS. Three of the  
291 five new loci were affecting amino acids, and two – acylcarnitines. Note that loci identified by  
292 BN-cGWAS (covariates selected via biochemical network) are a subset of 19 loci identified by  
293 GGM-cGWAS.

294 We have investigated the literature results available for the loci described in **Table 2** (see  
295 Supplementary Note 2 for details). From 20 loci we report in this study, 15 were genome-wide  
296 significant in recent large (n=7,478) meta-analysis of Biocrates metabolomics data by Draisma *et al.*  
297 [13]. For 11 of 15 loci, we observed significant association for exactly the same SNP-metabolite  
298 pair. However, not all metabolites analyzed in this study were analyzed by Draisma *et al.* [13];  
299 still, for the residual three loci the top association was with a metabolite within the same class as  
300 in our study and one from different lipid classes (see **Supplementary Table 2**). For the other five  
301 loci, which did not show significant association in work of Draisma *et al.* [13], we have checked  
302 if these were significant and replicated in work of Tsepilov *et al.* [14]. It should be noted though  
303 that in work [14], the same KORA F4 data set was used as discovery, and the analysis concerned  
304 the ratios of metabolites. Out of five loci, two were significant and replicated in [14], and in all  
305 two cases, the metabolite analyzed in this work was the part of the ratio analyzed by Tsepilov *et al.*  
306 *al.*. One of five was published before for the same trait in other studies [15,16]. We did not find  
307 previous evidence for association with metabolites for rs2943644 (*LOC646736*) and rs17112944  
308 (*LOC728755*). Therefore, we are inclined to consider observed associations with rs17112944 and  
309 rs2943644 as potential false positives; these two loci are excluded from further consideration.

310

311

312 **Table 1. Eleven loci found by cGWAS and uGWAS on metabolites for which at least one one-reaction-step neighbor was available.** Best SNP -  
313 Metabolite pair is shown for each locus. *chr:pos* corresponds to the physical position of SNP; EAF - effect allele frequency, beta(se) - estimated effect  
314 and standard error of the SNP; effA/refA - effect/reference alleles; P-value - p-value of the additive model; *Gene* - the most probable (according to  
315 DEPICT) associated gene in the region;  $N_{cov}$  – number of covariates used in cGWAS.

| Locus                    | SNP        | Metabolite     | chr:pos      | Gene           | effA/refA | EAF  | uGWAS        |          | cGWAS        |           | $N_{cov}$ |
|--------------------------|------------|----------------|--------------|----------------|-----------|------|--------------|----------|--------------|-----------|-----------|
|                          |            |                |              |                |           |      | beta(se)     | P-value  | beta(se)     | P-value   |           |
| <b>uGWAS &amp; cGWAS</b> |            |                |              |                |           |      |              |          |              |           |           |
| 1                        | rs211718   | C8             | 1:75879263   | <i>ACADM</i>   | T/C       | 0,30 | -0.45(0.034) | 3,26E-37 | -0.10(0.012) | 4,83E-17  | 1         |
| 1                        | rs211718   | C12            | 1:75879263   | <i>ACADM</i>   | T/C       | 0,30 | -0.04(0.036) | 2,19E-01 | 0.20(0.014)  | 1,67E-40  | 3         |
| 2                        | rs7705189  | PC ae C42:5    | 5:131651257  | <i>SLC22A4</i> | G/A       | 0,47 | 0.15(0.034)  | 8,65E-06 | 0.06(0.009)  | 1,49E-10  | 3         |
| 2                        | rs419291   | C5             | 5:131661254  | <i>SLC22A4</i> | T/C       | 0,38 | 0.26(0.035)  | 7,03E-14 | 0.17(0.029)  | 1,01E-08  | 1         |
| 3                        | rs9368564  | PC aa C42:5    | 6:11168269   | <i>ELOVL2</i>  | G/A       | 0,25 | -0.29(0.039) | 1,14E-13 | -0.15(0.024) | 1,63E-10  | 3         |
| 4                        | rs12356193 | C0             | 10:61083359  | <i>SLC16A9</i> | G/A       | 0,17 | -0.51(0.046) | 1,84E-27 | -0.42(0.042) | 1,67E-22  | 1         |
| 5                        | rs174547   | lysoPC a C20:4 | 11:61327359  | <i>FADS1</i>   | C/T       | 0,70 | 0.61(0.033)  | 1,24E-69 | 0.66(0.024)  | 2,96E-141 | 1         |
| 6                        | rs2066938  | C4             | 12:119644998 | <i>ACADS</i>   | G/A       | 0,27 | 0.73(0.033)  | 2,42E-93 | 0.72(0.032)  | 2,13E-100 | 1         |
| 7                        | rs10873201 | PC ae C36:5    | 14:67036352  | <i>PLEKHH1</i> | T/C       | 0,45 | -0.26(0.034) | 4,37E-14 | -0.21(0.018) | 2,38E-30  | 2         |
| 7                        | rs1077989  | PC ae C32:2    | 14:67045575  | <i>PLEKHH1</i> | C/A       | 0,46 | -0.30(0.034) | 2,23E-18 | -0.06(0.016) | 5,33E-05  | 3         |
| 8                        | rs4814176  | PC ae C40:2    | 20:12907398  | <i>SPTLC3</i>  | T/C       | 0,36 | 0.24(0.035)  | 5,74E-12 | 0.25(0.023)  | 1,58E-25  | 4         |
| <b>Only uGWAS</b>        |            |                |              |                |           |      |              |          |              |           |           |
| 9                        | rs8396     | C10            | 4:159850267  | <i>ETFDH</i>   | C/T       | 0,71 | 0.26(0.037)  | 2,11E-12 | 0.05(0.011)  | 6,67E-07  | 2         |
| <b>Only cGWAS</b>        |            |                |              |                |           |      |              |          |              |           |           |
| 10                       | rs4862429  | PC ae C42:5    | 4:186006834  | <i>ACSL1</i>   | T/C       | 0,31 | 0.02(0.037)  | 6,62E-01 | -0.06(0.010) | 6,57E-11  | 3         |
| 11                       | rs603424   | lysoPC a C16:1 | 10:102065469 | <i>PKD2L1</i>  | A/G       | 0,80 | 0.23(0.042)  | 5,34E-08 | 0.21(0.031)  | 1,39E-11  | 1         |

316

317

318 **Table 2. Twenty loci found by cGWAS and uGWAS approaches.** Best SNP - Metabolite pair is shown for each locus. *chr:pos* corresponds to the  
 319 physical position of SNP; EAF - effect allele frequency, beta(se) - estimated effect and standard error of SNP; effA/refA - effect/reference alleles; P-  
 320 value - p-value of the additive model; *Gene* - the most probable (according to DEPICT) associated gene in the region;  $N_{cov}$  – number of covariates for  
 321 cGWAS.

| Locus                    | SNP        | Metabolite     | chr:pos        | Gene           | effA/refA | EAF  | uGWAS        |          | cGWAS        |           |           |
|--------------------------|------------|----------------|----------------|----------------|-----------|------|--------------|----------|--------------|-----------|-----------|
|                          |            |                |                |                |           |      | beta(se)     | P-value  | beta(se)     | P-value   | $N_{cov}$ |
| <b>uGWAS &amp; cGWAS</b> |            |                |                |                |           |      |              |          |              |           |           |
| 1                        | rs211718   | C6 (C4:1-DC)   | 1:75,879,263   | <i>ACADM</i>   | T/C       | 0.30 | -0.48(0.034) | 4.64E-42 | -0.13(0.017) | 2.00E-13  | 7         |
| 1                        | rs7552404  | C6 (C4:1-DC)   | 1:75,908,534   | <i>ACADM</i>   | G/A       | 0.30 | -0.48(0.034) | 3.10E-42 | -0.12(0.017) | 3.25E-13  | 7         |
| 2                        | rs483180   | Ser            | 1:120,069,028  | <i>PHGDH</i>   | G/C       | 0.30 | -0.24(0.037) | 3.34E-11 | -0.24(0.028) | 1.50E-17  | 2         |
| 2                        | rs477992   | Ser            | 1:120,059,099  | <i>PHGDH</i>   | A/G       | 0.70 | 0.24(0.037)  | 5.15E-11 | 0.24(0.028)  | 5.82E-18  | 2         |
| 3                        | rs2286963  | C9             | 2:210,768,295  | <i>ACADL</i>   | G/T       | 0.63 | -0.49(0.032) | 1.10E-49 | -0.48(0.027) | 1.48E-67  | 3         |
| 4                        | rs8396     | C10            | 4:159,850,267  | <i>ETFDH</i>   | C/T       | 0.71 | 0.26(0.037)  | 2.02E-12 | 0.04(0.010)  | 1.49E-05  | 8         |
| 4                        | rs8396     | C7-DC          | 4:159,850,267  | <i>ETFDH</i>   | C/T       | 0.71 | -0.09(0.037) | 1.67E-02 | -0.13(0.020) | 3.29E-11  | 8         |
| 5                        | rs419291   | C5             | 5:131,661,254  | <i>SLC22A4</i> | T/C       | 0.38 | 0.26(0.035)  | 7.03E-14 | 0.17(0.026)  | 2.28E-10  | 3         |
| 5                        | rs270613   | C5             | 5:131,668,482  | <i>SLC22A4</i> | A/G       | 0.61 | -0.26(0.035) | 7.93E-14 | -0.17(0.026) | 8.48E-11  | 3         |
| 6                        | rs9393903  | PC aa C42:5    | 6:11,150,895   | <i>ELOVL2</i>  | A/G       | 0.75 | 0.29(0.039)  | 2.19E-13 | 0.18(0.020)  | 4.51E-19  | 6         |
| 6                        | rs9368564  | PC aa C42:5    | 6:11,168,269   | <i>ELOVL2</i>  | G/A       | 0.25 | -0.29(0.039) | 1.14E-13 | -0.19(0.021) | 7.84E-19  | 6         |
| 7                        | rs816411   | Ser            | 7:56,138,983   | <i>PHKG1</i>   | C/T       | 0.51 | -0.22(0.034) | 2.15E-10 | -0.19(0.026) | 5.16E-13  | 2         |
| 7                        | rs1894832  | Ser            | 7:56,144,740   | <i>PHKG1</i>   | C/T       | 0.51 | 0.21(0.034)  | 3.23E-10 | 0.19(0.026)  | 1.69E-13  | 2         |
| 8                        | rs12356193 | C0             | 10:61,083,359  | <i>SLC16A9</i> | G/A       | 0.17 | -0.51(0.046) | 1.84E-27 | -0.27(0.034) | 9.72E-16  | 3         |
| 9                        | rs174547   | lysoPC a C20:4 | 11:61,327,359  | <i>FADS1</i>   | C/T       | 0.70 | 0.61(0.033)  | 1.44E-69 | 0.07(0.011)  | 1.41E-10  | 9         |
| 9                        | rs174556   | PC ae C44:4    | 11:61,337,211  | <i>FADS1</i>   | T/C       | 0.27 | 0.09(0.038)  | 1.55E-02 | 0.21(0.014)  | 3.16E-46  | 3         |
| 10                       | rs2066938  | C4             | 12:119,644,998 | <i>ACADS</i>   | G/A       | 0.27 | 0.73(0.033)  | 5.87E-94 | 0.71(0.025)  | 1.31E-151 | 2         |
| 11                       | rs12879147 | PC aa C28:1    | 14:63,297,349  | <i>SYNE2</i>   | A/G       | 0.85 | -0.46(0.050) | 2.07E-19 | -0.12(0.019) | 5.94E-11  | 14        |

|                   |            |              |                |                  |     |      |              |          |              |          |    |
|-------------------|------------|--------------|----------------|------------------|-----|------|--------------|----------|--------------|----------|----|
| 11                | rs17101394 | SM(OH) C14:1 | 14:63,302,139  | <i>SYNE2</i>     | A/G | 0.83 | -0.32(0.050) | 1.00E-10 | -0.10(0.011) | 1.17E-17 | 7  |
| 12                | rs1077989  | PC ae C36:5  | 14:67,045,575  | <i>PLEKHH1</i>   | C/A | 0.46 | -0.26(0.034) | 3.42E-14 | -0.08(0.010) | 8.25E-16 | 10 |
| 12                | rs1077989  | PC ae C32.2  | 14:67,045,575  | <i>PLEKHH1</i>   | C/A | 0.46 | -0.30(0.034) | 2.23E-18 | -0.05(0.016) | 1.31E-03 | 6  |
| 13                | rs4814176  | SM(OH).C22:1 | 20:12,907,398  | <i>SPTLC3</i>    | T/C | 0.36 | 0.03(0.035)  | 4.51E-01 | -0.07(0.009) | 1.10E-16 | 10 |
| 13                | rs4814176  | SM(OH) C24:1 | 20:12,907,398  | <i>SPTLC3</i>    | T/C | 0.36 | 0.24(0.035)  | 5.40E-12 | 0.09(0.013)  | 3.04E-11 | 9  |
| 14                | rs5746636  | Pro          | 22:17,276,301  | <i>PRODH</i>     | T/G | 0.24 | -0.31(0.039) | 3.00E-15 | -0.32(0.034) | 1.91E-20 | 2  |
| <b>Only uGWAS</b> |            |              |                |                  |     |      |              |          |              |          |    |
| 15                | rs2943644  | C5:1-DC      | 2:226,754,586  | <i>LOC646736</i> | C/T | 0.68 | 0.32(0.042)  | 5.14E-14 | 0.09(0.022)  | 3.58E-05 | 5  |
| <b>Only cGWAS</b> |            |              |                |                  |     |      |              |          |              |          |    |
| 16                | rs1374804  | Gly          | 3:127,391,188  | <i>ALDH1L1</i>   | A/G | 0.64 | 0.20(0.036)  | 1.88E-08 | 0.21(0.030)  | 8.08E-13 | 3  |
| 17                | rs4862429  | PC ae C42:5  | 4:186,006,834  | <i>ACSL1</i>     | T/C | 0.31 | 0.02(0.037)  | 6.62E-01 | -0.06(0.008) | 1.25E-12 | 8  |
| 18                | rs603424   | C16:1        | 10:102,065,469 | <i>PKD2L1</i>    | A/G | 0.80 | 0.16(0.042)  | 9.51E-05 | 0.14(0.018)  | 1.32E-13 | 9  |
| 19                | rs2657879  | Gln          | 12:55,151,605  | <i>GLS2</i>      | G/A | 0.21 | -0.24(0.042) | 2.82E-08 | -0.27(0.031) | 9.37E-18 | 5  |
| 20                | rs17112944 | C6:1         | 14:27,179,297  | <i>LOC728755</i> | A/G | 0.90 | -0.28(0.059) | 2.09E-06 | -0.21(0.032) | 1.38E-10 | 9  |

322

323

## 324 **Conclusions**

325 We have developed a new approach for network-based conditional genome-wide association study  
326 for metabolomics data (conditional GWAS, cGWAS). For each metabolite trait, we select a set of  
327 other metabolites, to be used as covariates in GWAS. The selection of covariates could be done in  
328 a mechanistic way, e.g. based on known biological relations between traits of interest; or in a data-  
329 driven way, e.g. based on partial correlations. The method has modest computational costs and can  
330 exploit either individual- or summary-level GWAS data. It has a potential to increase the power  
331 of genetic association analysis because of reduced noise and ability to detect specific pleiotropic  
332 scenarios, hardly detectable via standard single-trait GWAS.

333 We have applied cGWAS approach to analysis of 151 metabolomics traits (Biocrates  
334 panel) in large (n=1,784) population-based KORA cohort. While conventional uGWAS identified  
335 15 loci in this data set, cGWAS was able to identify up to 5 additional loci. At the same time, we  
336 have observed that for some loci the power of cGWAS was decreased. We found that in cGWAS  
337 power is always gained because of increased precision of genetic effect estimation, but it may be  
338 decreased or increased in presence of specific pleiotropic association scenarios.

339 We show that conditional analysis has especially high power under scenarios when locus-  
340 specific genotypic and environmental sources of covariance between the trait and its covariates  
341 are ‘surprising’ (acting in opposite direction). This type of pleiotropy is not unexpected for  
342 metabolic traits, and we provide an empirical demonstration of existence of such scenarios in this  
343 work. This is further demonstrated by the fact that the power gain from the pleiotropic component  
344 was higher when we used a mechanistic way of covariate selection (one-reaction-step neighbors  
345 from a biochemical network), as opposed to data-driven network (based on Gaussian Graphical  
346 Model). We may expect that with increased knowledge of biological networks the mechanistic  
347 way of covariate selection may become preferable.

348 However, when genotypic and environmental sources of covariance are consistent,  
349 cGWAS may lose power even compared with standard GWAS without biological covariates. One  
350 may argue that a joint analysis testing effects of genotype on the set of traits simultaneously may  
351 be a better solution, which maintains power across wide range of scenarios. While we are not  
352 arguing with this viewpoint, we must emphasize one aspect which makes conditional analysis  
353 attractive; namely, better interpretability of the obtained results in terms of effect of genotype on  
354 specific trait. The latter may be important in the next step when we may try to relate obtained  
355 results with these obtained previously for other traits in other GWAS, e.g. using methods described  
356 by [17–19].



357            Presence of highly correlated traits and different pleiotropic scenarios are not unique for  
358 metabolomics. Therefore, we expect that cGWAS may be a powerful approach for investigation  
359 of other omics traits. Low computational costs and possibility of analysis based on summary-level  
360 data makes cGWAS a promising approach to investigate new and re-analyze existing omics data  
361 sets in order to provide deeper understanding of functional genomics.

362

## 363 **Materials and Methods**

### 364 **KORA study**

365 The KORA cohort (Cooperative Health Research in the region of Augsburg) are population-based  
366 studies from the region of Augsburg in Southern Germany [20]. The KORA F4 is the follow-up  
367 survey (from 2006 to 2008) of the base line survey KORA S4 that was conducted from 1999 to  
368 2001. All study protocols were approved by the ethics committee of the Bavarian Medical  
369 Chamber (Bayerische Landesärztekammer), and all participants gave written informed consent.

370 Concentrations of 163 metabolites were quantified in 3,061 serum samples of KORA F4  
371 participants using flow injection electrospray ionization tandem mass spectrometry and the  
372 AbsoluteIDQ™ p150 Kit (BIOCRATES Life Sciences AG, Innsbruck, Austria) [21]. After quality  
373 control 151 metabolite measurements were used in analysis. Details of the methods and quality  
374 control of the metabolite measurements and details of the metabolite nomenclatures were given  
375 previously [21]. Metabolite nomenclatures could be found in Supplementary Table 3.

376 Genotyping was performed with the Affymetrix 6.0 SNP array (534,174 SNP markers after  
377 quality control) with further imputation using HapMap2 (release 22) as reference panel resulting  
378 in a total of 1,717,498 SNPs (details given in KOLZ *et al.* 2009 [22]). For 1,785 individuals both  
379 metabolite concentrations and genotypes were available in the KORA F4 study.

380

### 381 **Statistical analysis**

382 Calculation of partial correlations and their p-values were performed using “ppcor” [23] R library.  
383 Graphical representations were made by “ggm” [24] R library. Similar to previous work [12], we  
384 considered partial correlation coefficient as significant if correlation’s p-value was less than  
385  $0.01/(151*150/2)$  ( $8.83 \times 10^{-7}$ ).

386 For the GWAS analysis we used OmicABEL software [25]. All traits were first adjusted  
387 for sex, age and batch effect, and then residuals were transformed using inverse-normal  
388 transformation [26] prior to GWAS. The genotypes from KORA F4 were used. Only SNPs that  
389 had a call rate  $\geq 0.95$ ,  $R^2 \geq 0.3$ , Hardy–Weinberg equilibrium (HWE)  $p \geq 10^{-6}$  and MAF  $\geq 0.1$   
390 (1,717,498 SNPs in total) were considered in analysis. The genomic control method was applied  
391 to correct for a possible inflation of the test statistics. Lambda for all traits was between 1.00 and  
392 1.03. To define independent loci, we have selected all genome-wide significant SNP-trait pairs,  
393 and identified the groups which were separated by  $>500\text{kb}$ . For regions of association, the most  
394 associated SNP-trait pair (as indicated by the lowest p-value) was selected to represent this locus.  
395 cGWAS and uGWAS results were considered to come from different loci if top SNPs were

396 separated by >500kb. The threshold for GWAS analysis for 151 traits was  $p\text{-value}=5e\text{-}$   
397  $8/151=3.31\times 10^{-10}$ .

398 When partitioning  $\log(\text{cGWAS}/\text{uGWAS})$  test statistic into noise and pleiotropic  
399 components (equation (2), Figure 1), we used all known loci that were significant in either cGWAS  
400 or uGWAS analyses. If locus included two SNP-trait pairs and traits were different we included  
401 both. If locus consisted two SNP-trait pairs and traits were the same, we included the one with  
402 lowest uGWAS p-value. When comparing the pleiotropic and noise components, the Wilcoxon  
403 paired samples test was used to perform statistical significance testing. For contrasting values of  
404 chi-squared test statistics, we employed similar procedure, with the exception that if results from  
405 specific analysis for specific locus were not genome-wide significant, for this method we have  
406 selected the maximal chi-squared test statistic from the  $\pm 500\text{kb}$  region centered at the top  
407 association detected by the alternative method.

408

#### 409 ***In silico* functional annotation**

410 We conducted functional annotation of the novel discoveries. For prioritizing genes in associated  
411 regions, gene set enrichment and tissue/cell type enrichment analyses, we used the DEPICT  
412 software v. 140721 [27] with following parameters:  $\text{flag\_loci} = 1$ ;  $\text{flag\_genes} = 1$ ;  $\text{flag\_genesets}$   
413  $= 1$ ;  $\text{flag\_tissues} = 1$ ;  $\text{param\_ncores} = 2$ , and further manual annotation (h37 assembly). All 27  
414 SNPs clustered in 20 loci found by cGWAS and uGWAS (Table 2) were included into analysis. If  
415 several genes were proposed for a SNP by DEPICT we selected the gene with the lowest nominal  
416 DEPICT P-value. In most of the cases the results of manual annotation matched with the results  
417 of DEPICT annotation (see Supplementary Note 2). Additionally, we have looked up each SNP  
418 using the Phenoscanner [28] database to check whether it was previously reported to be associated  
419 with metabolic traits with p-value lower than  $5\times 10^{-8}$  and proxy  $r^2 = 0.7$ .

420

## 421 **Additional files**

422 Supplementary Note 1 – cGWAS using summary level data

423 Supplementary Note 2 – Literature search of loci identified by cGWAS and uGWAS

424 Supplementary Tables

425 ST 1 – BD-GWAS and GGM-GWAS for 105 metabolites

426 ST 2 – GGM-cGWAS and uGWAS for 151 metabolites

427 ST 3 - List of metabolites measured with the AbsoluteIDQ® p150 Kit

428 Supplementary Figures

429 SF 1 – Partial correlations network

430 SF 2 – Manhattan plots for cGWAS and uGWAS for 151 metabolites

431 SF 3 – Comparison of effect estimates and their standard errors for SNPs from Table 2

432

## 433 **Abbreviations**

434 GWAS – genome wide association study

435 cGWAS – conditional GWAS

436 uGWAS – univariate GWAS (trait-by-trait)

437 BN-cGWAS – cGWAS based on biochemical networks

438 GGM-cGWAS – cGWAS based on partial correlations network

439

## 440 **Acknowledgements**

441 We would like to thank Athina Spilopoulou and Felix Agakov for fruitful discussion. We thank  
442 Alexander Zlobin and Alexander Grishenko for help with arranging tables and figures for the  
443 manuscript. We would like to express our gratitude to Sophie Molnos for help with management  
444 of the data.

445

## 446 **Funding**

447 The KORA study was initiated and financed by the Helmholtz Zentrum München – German  
448 Research Center for Environmental Health, which is funded by the German Federal Ministry of  
449 Education and Research (BMBF) and by the State of Bavaria. Furthermore, KORA research was  
450 supported within the Munich Center of Health Sciences (MC-Health), Ludwig-Maximilians-  
451 Universität, as part of LMUinnovativ.

452 This work was supported by the European Union FP7 framework projects MIMOmics (grant  
453 agreement nr. 305280) and Pain-Omics (grant agreement nr. 602736).

454 The work of YT, SS, OZ and YA was supported by a grant from the Russian Foundation for  
455 Science (RSCF grant № 14-14-00313).

456

457 **Authors contribution**

458 YT, CG, YA planned and supervised the study; PC,CP and JA, KG, RW-S collected data, CG, KS  
459 contributed data for analysis; YT, OZ, SS performed data analysis; YT, YA, CG, OZ, JK, KS  
460 discussed and interpreted the results; YT, OZ, CG, YA wrote the manuscript. All authors have  
461 corrected and approved the final version of the manuscript.

462

## 463 References

- 464 1. Visscher PM, Brown MA, McCarthy MI, Yang J (2012) Five Years of GWAS Discovery.  
465 *Am J Hum Genet* 90: 7–24. Available:  
466 <http://linkinghub.elsevier.com/retrieve/pii/S0002929711005337>.
- 467 2. Ritchie MD, Holzinger ER, Li R, Pendergrass SA, Kim D (2015) Methods of integrating  
468 data to uncover genotype–phenotype interactions. *Nat Rev Genet* 16: 85–97. Available:  
469 <http://www.nature.com/doi/finder/10.1038/nrg3868>.
- 470 3. van der Sijde MR, Ng A, Fu J (2014) Systems genetics: From GWAS to disease pathways.  
471 *Biochim Biophys Acta - Mol Basis Dis* 1842: 1903–1909. Available:  
472 <http://linkinghub.elsevier.com/retrieve/pii/S0925443914001124>.
- 473 4. Cichonska A, Rousu J, Martinen P, Kangas AJ, Soinen P, et al. (2016) metaCCA:  
474 summary statistics-based multivariate meta-analysis of genome-wide association studies  
475 using canonical correlation analysis. *Bioinformatics* 32: 1981–1989. Available:  
476 <http://www.ncbi.nlm.nih.gov/pubmed/27153689>.
- 477 5. Stephens M (2013) A unified framework for association analysis with multiple related  
478 phenotypes. *PLoS One* 8: e65245. Available:  
479 <http://www.ncbi.nlm.nih.gov/pubmed/23861737>.
- 480 6. O’Reilly PF, Hoggart CJ, Pomyen Y, Calboli FCF, Elliott P, et al. (2012) MultiPhen: joint  
481 model of multiple phenotypes can increase discovery in GWAS. *PLoS One* 7: e34861.  
482 Available:  
483 [http://www.pubmedcentral.nih.gov/articlerender.fcgi?artid=3342314&tool=pmcentrez&re](http://www.pubmedcentral.nih.gov/articlerender.fcgi?artid=3342314&tool=pmcentrez&rendertype=abstract)  
484 [ndertype=abstract](http://www.pubmedcentral.nih.gov/articlerender.fcgi?artid=3342314&tool=pmcentrez&rendertype=abstract). Accessed 20 September 2014.
- 485 7. Galesloot TE, van Steen K, Kiemeny LALM, Janss LL, Vermeulen SH (2014) A  
486 comparison of multivariate genome-wide association methods. *PLoS One* 9: e95923.  
487 Available: <http://www.ncbi.nlm.nih.gov/pubmed/24763738>. Accessed 20 September 2014.
- 488 8. Inouye M, Ripatti S, Kettunen J, Lyytikäinen L-P, Oksala N, et al. (2012) Novel Loci for  
489 metabolic networks and multi-tissue expression studies reveal genes for atherosclerosis.  
490 *PLoS Genet* 8: e1002907. Available: <http://dx.plos.org/10.1371/journal.pgen.1002907>.
- 491 9. Kettunen J, Demirkan A, Würtz P, Draisma HHMM, Haller T, et al. (2016) Genome-wide  
492 study for circulating metabolites identifies 62 loci and reveals novel systemic effects of  
493 LPA. *Nat Commun* 7: 11122. Available:  
494 <http://www.ncbi.nlm.nih.gov/pubmed/27005778>  
495 <http://www.nature.com/doi/finder/10.1038/ncomms11122>.
- 496 10. Smith GD, Ebrahim S (2003) “Mendelian randomization”: can genetic epidemiology  
497 contribute to understanding environmental determinants of disease? *Int J Epidemiol* 32: 1–  
498 22. Available: <http://www.ncbi.nlm.nih.gov/pubmed/12689998>.
- 499 11. Bulik-Sullivan B, Finucane HK, Anttila V, Gusev A, Day FR, et al. (2015) An atlas of  
500 genetic correlations across human diseases and traits. *Nat Genet* 47: 1236–1241.  
501 doi:10.1038/ng.3406.
- 502 12. Krumsiek J, Suhre K, Illig T, Adamski J, Theis FJ (2011) Gaussian graphical modeling  
503 reconstructs pathway reactions from high-throughput metabolomics data. *BMC Syst Biol*  
504 5: 21. Available:  
505 [http://www.pubmedcentral.nih.gov/articlerender.fcgi?artid=3224437&tool=pmcentrez&re](http://www.pubmedcentral.nih.gov/articlerender.fcgi?artid=3224437&tool=pmcentrez&rendertype=abstract)  
506 [ndertype=abstract](http://www.pubmedcentral.nih.gov/articlerender.fcgi?artid=3224437&tool=pmcentrez&rendertype=abstract). Accessed 23 May 2013.
- 507 13. Draisma HHM, Pool R, Kobl M, Jansen R, Petersen A-K, et al. (2015) Genome-wide  
508 association study identifies novel genetic variants contributing to variation in blood  
509 metabolite levels. *Nat Commun* 6: 7208. Available:  
510 <http://www.ncbi.nlm.nih.gov/pubmed/26068415>.
- 511 14. Tsepilov YA, Shin S-Y, Soranzo N, Spector TD, Prehn C, et al. (2015) Nonadditive Effects  
512 of Genes in Human Metabolomics. *Genetics* 200: 707–718. Available:  
513 <http://www.genetics.org/cgi/doi/10.1534/genetics.115.175760>.

- 514 15. Xie W, Wood AR, Lyssenko V, Weedon MN, Knowles JW, et al. (2013) Genetic variants  
515 associated with glycine metabolism and their role in insulin sensitivity and type 2 diabetes.  
516 *Diabetes* 62: 2141–2150. Available: <http://www.ncbi.nlm.nih.gov/pubmed/23378610>.
- 517 16. Shin S-Y, Fauman EB, Petersen A-K, Krumsiek J, Santos R, et al. (2014) An atlas of genetic  
518 influences on human blood metabolites. *Nat Genet* 46: 543–550. Available:  
519 <http://www.nature.com/doifinder/10.1038/ng.2982>. Accessed 12 May 2014.
- 520 17. Zhu Z, Zhang F, Hu H, Bakshi A, Robinson MR, et al. (2016) Integration of summary data  
521 from GWAS and eQTL studies predicts complex trait gene targets. *Nat Genet* 48: 481–487.  
522 Available:  
523 <http://www.nature.com/doifinder/10.1038/ng.3538%5Cnhttp://www.ncbi.nlm.nih.gov/pub>  
524 [med/27019110](http://www.ncbi.nlm.nih.gov/pubmed/27019110).
- 525 18. Pickrell JK, Berisa T, Liu JZ, Séguérel L, Tung JY, et al. (2016) Detection and interpretation  
526 of shared genetic influences on 42 human traits. *Nat Genet*: 19885. doi:10.1038/ng.3570.
- 527 19. Giambartolomei C, Vukcevic D, Schadt EE, Franke L, Hingorani AD, et al. (2014)  
528 Bayesian Test for Colocalisation between Pairs of Genetic Association Studies Using  
529 Summary Statistics. *PLoS Genet* 10: e1004383. Available:  
530 <http://dx.plos.org/10.1371/journal.pgen.1004383>.
- 531 20. Wichmann H-E, Gieger C, Illig T (2005) KORA-gen--resource for population genetics,  
532 controls and a broad spectrum of disease phenotypes. *Gesundheitswesen* 67 Suppl 1: S26-  
533 30. Available: <http://www.ncbi.nlm.nih.gov/pubmed/16032514>. Accessed 6 June 2013.
- 534 21. Illig T, Gieger C, Zhai G, Römisch-Margl W, Wang-Sattler R, et al. (2010) A genome-wide  
535 perspective of genetic variation in human metabolism. *Nat Genet* 42: 137–141. Available:  
536 <http://www.ncbi.nlm.nih.gov/pubmed/20037589>. Accessed 23 May 2013.
- 537 22. Kolz M, Johnson T, Sanna S, Teumer A, Vitart V, et al. (2009) Meta-analysis of 28,141  
538 individuals identifies common variants within five new loci that influence uric acid  
539 concentrations. *PLoS Genet* 5: e1000504. Available:  
540 <http://www.pubmedcentral.nih.gov/articlerender.fcgi?artid=2683940&tool=pmcentrez&re>  
541 [ndertype=abstract](http://www.pubmedcentral.nih.gov/articlerender.fcgi?artid=2683940&tool=pmcentrez&rendertype=abstract). Accessed 30 May 2013.
- 542 23. Kim S (2015) ppcor: An R Package for a Fast Calculation to Semi-partial Correlation  
543 Coefficients. *Commun Stat Appl Methods* 22: 665–674. Available:  
544 <http://www.csam.or.kr/journal/view.html?doi=10.5351/CSAM.2015.22.6.665>.
- 545 24. Marchetti GM (2006) Independencies Induced from a Graphical Markov Model after  
546 Marginalization and Conditioning: The R Package ggm. *J Stat Softw* 15. Available:  
547 <http://www.jstatsoft.org/v15/i06/>.
- 548 25. Fabregat-Traver D, Sharapov SZ, Hayward C, Rudan I, Campbell H, et al. (2014) High-  
549 Performance Mixed Models Based Genome-Wide Association Analysis with omicABEL  
550 software. *F1000Research* 3: 200. Available: <http://f1000research.com/articles/3-200/v1>.
- 551 26. Beasley TM, Erickson S, Allison DB (2009) Rank-based inverse normal transformations  
552 are increasingly used, but are they merited? *Behav Genet* 39: 580–595. Available:  
553 <http://www.pubmedcentral.nih.gov/articlerender.fcgi?artid=2921808&tool=pmcentrez&re>  
554 [ndertype=abstract](http://www.pubmedcentral.nih.gov/articlerender.fcgi?artid=2921808&tool=pmcentrez&rendertype=abstract). Accessed 7 November 2013.
- 555 27. Pers TH, Karjalainen JM, Chan Y, Westra H-J, Wood AR, et al. (2015) Biological  
556 interpretation of genome-wide association studies using predicted gene functions. *Nat*  
557 *Commun* 6: 5890. Available: <http://www.ncbi.nlm.nih.gov/pubmed/25597830>.
- 558 28. Staley JR, Blackshaw J, Kamat MA, Ellis S, Surendran P, et al. (2016) PhenoScanner: a  
559 database of human genotype–phenotype associations. *Bioinformatics* 32: 3207–3209.  
560 Available:  
561 <http://bioinformatics.oxfordjournals.org/lookup/doi/10.1093/bioinformatics/btw373>.
- 562
